# Supplementary material for: Two-Dimensional Tellurium Nanosheets for the Efficient Nonenzymatic Electrochemical Detection of H2O2
Source: MDPI journal article supplement (doi:10.3390/chemosensors12020017), 2024-01-23
Supplement: s1 [file s1]

Archive with 1 entries (1 files):
- chemosensors-2804501-supplementary.pdf
