# Supplementary material for: Two-Dimensional Tellurium Nanosheets for the Efficient Nonenzymatic Electrochemical Detection of H2O2
Source: MDPI journal article supplement (doi:10.3390/chemosensors12020017), 2024-01-23
Supplement: s1 [file s1 › chemosensors-2804501-supplementary.pdf]

## Supporting Information

### Two-Dimensional Tellurium Nanosheets for Efficient Nonenzymatic Electrochemical

#### Detection of $\text{H}_2\text{O}_2$

Amit Kumar Shringi, Rajeev Kumar, Netanya F. Dennis and Fei Yan

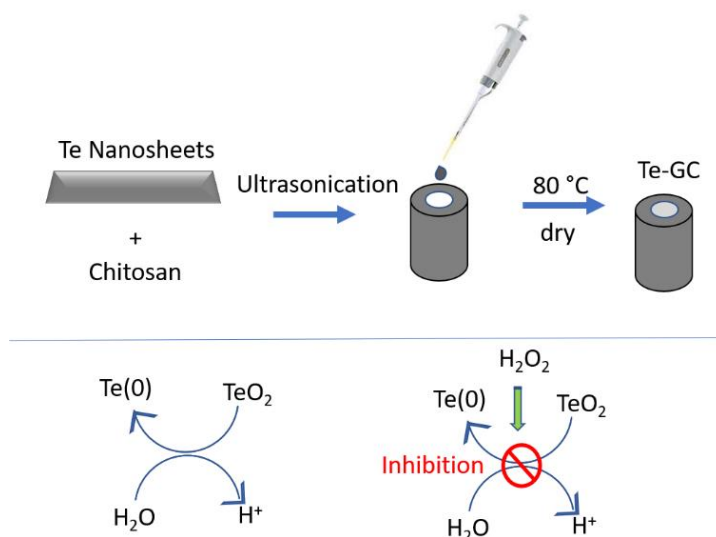

**Figure S1.** Top: Illustration depicting the sensor fabrication process. Bottom: Proposed mechanism for  $\text{H}_2\text{O}_2$  sensing utilizing Te nanosheets.

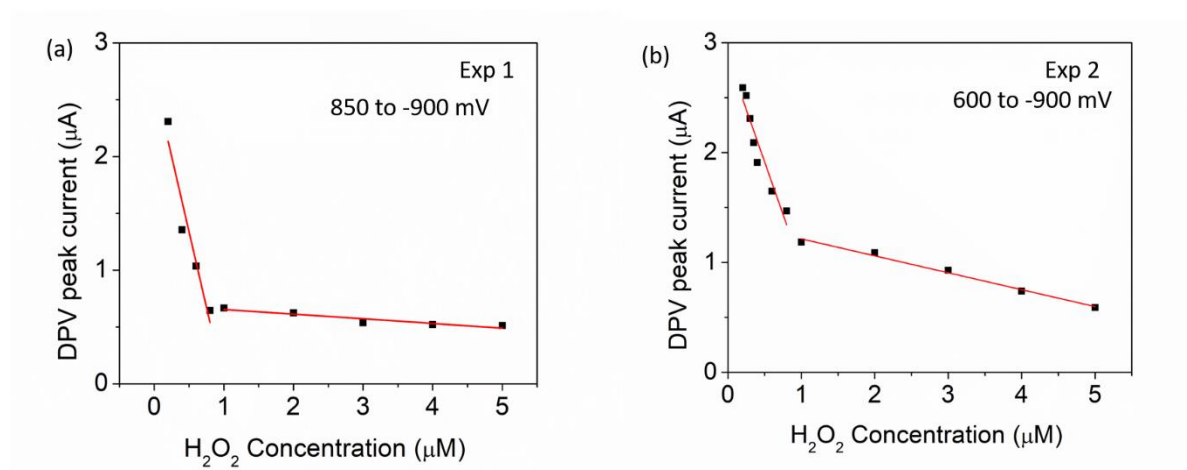

**Figure S2.** Two sets of DPV experiment results demonstrate the reproducibility of  $\text{H}_2\text{O}_2$  sensing. The lower potential window exhibits superior sensitivity and less inhibition.
